# Supplementary material
Source: PubMed Central journal article supplement (PMC3643224)
Supplement: Supp_Table1.pdf [file Supp_Table1.pdf]

## Supplementary Data

TABLE S1. MEDIAN INPATIENT REFERENCE GLUCOSE VALUES 71–180 MG/dL BY SITE

| Site | n  | <i>Median % of glucose values 71–180 mg/dL</i> |              |              |
|------|----|------------------------------------------------|--------------|--------------|
|      |    | <i>Day 1</i>                                   | <i>Day 2</i> | <i>Day 3</i> |
| 1    | 12 | 74%                                            | 79%          | 78%          |
| 2    | 14 | 72%                                            | 83%          | 89%          |
| 3    | 11 | 85%                                            | 88%          | 88%          |
| 4    | 6  | 80%                                            | 90%          | 80%          |
| 5    | 5  | 71%                                            | 67%          | 81%          |
